# Supplementary material for: Supporting patient access to medicines in community palliative care: on-line survey of health professionals’ practice, perceived effectiveness and influencing factors
Source: Springer Nature journal article supplement (doi:10.1186/s12904-020-00649-3), 2020-09-24
Supplement: MOESM1 [file 18412752]

# ACTMED study

---

Page 1

## **ActMed Study: Access to medicines during the last year of life**

We would like to seek your views on providing patients and carers with access to medicines during the last year of life, and on what facilitates and prevents good practice. Your experience will contribute to a comprehensive overview of practice which will help shape national policy.

What do we mean when we refer to medicines access?

- **Medicines** - Regular and as necessary medicines, administered via all routes used for symptom management during the last year of life (**excluding** 'just-in-case' boxes).
- **Access** - prescribing, dispensing, supply and associated information-giving about medicines and information about access to medicines

The questionnaire will take approximately 10-15 minutes to complete. It is designed for all healthcare professionals, with supplementary questions for non-medical prescribers and community pharmacists.

If you have any queries about the research please contact Dr Natasha Campling, [ActMed Senior Research Fellow](#), via email at [actmed@soton.ac.uk](mailto:actmed@soton.ac.uk)

**Thank you in advance for your help with this important study**

Professor Sue Latter  
Chief Investigator

This study has been funded by the NIHR Health Services and Delivery Research programme (HS&DR 16/52/23) and this survey is approved by the HRA (IRAS number 231837)

Please tick the box to consent to take part in this survey

I agree to take part

**SECTION A: YOUR ROLE**

**A1 How would you describe your role?**

- General practitioner (please go to Question A2)
- Clinical nurse specialist working from a hospice (please go to Question A2)
- Clinical nurse specialist employed by a Community Trust (please go to Question A2)
- Community nurse (RN) (please go to Question A2)
- Pharmacist
- Other role (please go to Question A2)

If other role, please describe

***If you are a primary care pharmacist employed by GP practice(s), does this role include:***

|                                                             | Yes                      | No                       |
|-------------------------------------------------------------|--------------------------|--------------------------|
| Advising patients/carers about palliative care medicines    | <input type="checkbox"/> | <input type="checkbox"/> |
| Medicines optimisation reviews for palliative care patients | <input type="checkbox"/> | <input type="checkbox"/> |

***If you are a community pharmacist in a community pharmacy, do you provide an enhanced service for palliative care (e.g. on-demand availability of specialist drugs)?***

Yes  No

If yes, does this service cover:

|                                                                                                                                                             | Yes                      | No                       |
|-------------------------------------------------------------------------------------------------------------------------------------------------------------|--------------------------|--------------------------|
| Stocking a locally agreed list of core palliative care medicines                                                                                            | <input type="checkbox"/> | <input type="checkbox"/> |
| Out-of-hours availability of palliative care medicines from your pharmacy                                                                                   | <input type="checkbox"/> | <input type="checkbox"/> |
| Out-of-hours availability of palliative care medicines from other linked pharmacies in your area                                                            | <input type="checkbox"/> | <input type="checkbox"/> |
| Provision of information on the service to other pharmacy contractors and health care professionals in order that they can signpost patients to the service | <input type="checkbox"/> | <input type="checkbox"/> |
| Provision of information on the service to patients and carers directly                                                                                     | <input type="checkbox"/> | <input type="checkbox"/> |

Is your pharmacy independent or part of a chain?

Independent  Small multiple  Large multiple

**A2. Do you work out-of-hours?**

No  Between 6.30pm - 8am weekdays  Weekends/bank holidays

**SECTION B. ACCESS TO PALLIATIVE CARE MEDICINES  
PRESCRIPTIONS DURING WORKING HOURS**

**B1. Which of the following are you able to provide for patients to obtain *new prescriptions* during working hours? Please select all options *you* use:**

|                                       | Yes                      | No                       | Not applicable           |
|---------------------------------------|--------------------------|--------------------------|--------------------------|
| Personal home visits                  | <input type="checkbox"/> | <input type="checkbox"/> | <input type="checkbox"/> |
| Telephone consultations               | <input type="checkbox"/> | <input type="checkbox"/> | <input type="checkbox"/> |
| E-mail consultations                  | <input type="checkbox"/> | <input type="checkbox"/> | <input type="checkbox"/> |
| GP practice appointments              | <input type="checkbox"/> | <input type="checkbox"/> | <input type="checkbox"/> |
| Community pharmacy-based appointments | <input type="checkbox"/> | <input type="checkbox"/> | <input type="checkbox"/> |
| Referral to a nurse prescriber        | <input type="checkbox"/> | <input type="checkbox"/> | <input type="checkbox"/> |
| Referral to a pharmacist prescriber   | <input type="checkbox"/> | <input type="checkbox"/> | <input type="checkbox"/> |
| Referral to a GP                      | <input type="checkbox"/> | <input type="checkbox"/> | <input type="checkbox"/> |

Other, please describe:

**B2. Overall, how satisfied are you with your ability to support patients in obtaining *new prescriptions* for palliative care medicines?**

- Not at all
- Slightly
- Somewhat
- Very
- Extremely

**B3. Are you aware of community pharmacies ('palliative care pharmacies') in your area that provide an enhanced service for palliative care (e.g. on-demand availability of specialist drugs)?**

- Yes
- None providing services (please go to Section C)
- Not aware (please go to Section C)

**B4. In your opinion, does an enhanced service for palliative care (on-demand availability of specialist drugs) via community pharmacies facilitate speed of access to medicines for patients?**

- Yes
- No

Please give reasons for your response:

**B5. How often do you provide information on enhanced services for palliative care (e.g. on-demand availability of specialist drugs) to patients and carers?**

|                              |                             |                                 |
|------------------------------|-----------------------------|---------------------------------|
| <input type="radio"/> Always | <input type="radio"/> Often | <input type="radio"/> Sometimes |
| <input type="radio"/> Rarely | <input type="radio"/> Never |                                 |

If you do not "always" provide information on enhanced services for palliative care to patients and carers, please give reasons for your response:

**SECTION C. ACCESS TO PALLIATIVE CARE MEDICINES OUT-OF-HOURS**

C1. In your area, do palliative care clinical nurse specialists (CNSs) provide a 7 days a week community service between 9am - 5pm?

Yes                       No                       Don't know

If yes, how effective is it at facilitating out-of-hours medicines access?

Not at all                       Slightly                       Somewhat  
 Very                       Extremely

Please give reasons for your response

**C2. When a patient requires medicine(s) arising from an out-of-hours consultation are they usually:** *(please select one response that most accurately reflects usual practice)*

- Given a PRESCRIPTION by the healthcare professional during the consultation
- Referred to another healthcare professional for the PRESCRIPTION of the medicine
- Other

If you selected Other, please specify:

**C3. This question is about your ability to *signpost* services, rather than the quality of the services. Overall, how confident are you in your ability to advise patients/carers how best to access palliative care medicines out-of-hours?**

- Not at all
- Slightly
- Somewhat
- Very
- Extremely



**SECTION D. INFORMATION PROVISION ABOUT MEDICINES AT THE POINT OF ACCESS**

**D1. When a patient/carer is in need of a prescription, dispensing and/or supply of a palliative care medicine, how often do you give the following information?**

|                                                                          | Always                   | Often                    | Sometimes                | Rarely                   | Never                    |
|--------------------------------------------------------------------------|--------------------------|--------------------------|--------------------------|--------------------------|--------------------------|
| Possible side-effects of the medicine(s)                                 | <input type="checkbox"/> | <input type="checkbox"/> | <input type="checkbox"/> | <input type="checkbox"/> | <input type="checkbox"/> |
| How to manage possible side-effects of the medicine(s)                   | <input type="checkbox"/> | <input type="checkbox"/> | <input type="checkbox"/> | <input type="checkbox"/> | <input type="checkbox"/> |
| How to tell if the medicine is working                                   | <input type="checkbox"/> | <input type="checkbox"/> | <input type="checkbox"/> | <input type="checkbox"/> | <input type="checkbox"/> |
| How to tell if the medicine is not working                               | <input type="checkbox"/> | <input type="checkbox"/> | <input type="checkbox"/> | <input type="checkbox"/> | <input type="checkbox"/> |
| What to do if the medicine is not working                                | <input type="checkbox"/> | <input type="checkbox"/> | <input type="checkbox"/> | <input type="checkbox"/> | <input type="checkbox"/> |
| Who to contact if changes to the medicines or new medicines are required | <input type="checkbox"/> | <input type="checkbox"/> | <input type="checkbox"/> | <input type="checkbox"/> | <input type="checkbox"/> |

**SECTION E. INTER-PROFESSIONAL COMMUNICATION ABOUT MEDICINES**

**E1. Do you have access to shared patient records for communication about medicines access between health professionals? Tick all that you are able to access:**

|                                            | Yes - Paper              | Yes - Electronic         | No                       |
|--------------------------------------------|--------------------------|--------------------------|--------------------------|
| GP records                                 | <input type="checkbox"/> | <input type="checkbox"/> | <input type="checkbox"/> |
| GP out of hours records                    | <input type="checkbox"/> | <input type="checkbox"/> | <input type="checkbox"/> |
| Community nurse records                    | <input type="checkbox"/> | <input type="checkbox"/> | <input type="checkbox"/> |
| Hospice/palliative care specialist records | <input type="checkbox"/> | <input type="checkbox"/> | <input type="checkbox"/> |
| Community pharmacy records                 | <input type="checkbox"/> | <input type="checkbox"/> | <input type="checkbox"/> |
| Summary Care Record                        | <input type="checkbox"/> | <input type="checkbox"/> | <input type="checkbox"/> |

**E2. In your service, is there a 'main' prescriber, who usually carries out the initial patient assessment, when a patient starts on a palliative care pathway?**

- Yes  No

If yes, what is their role?

- General practitioner  Palliative care consultant  Palliative care clinical nurse specialist  
 Other

If you selected Other, please specify:

Is it communicated so that other professionals are clear who the main prescriber is?

- Yes  No

**E3. Overall, how satisfied are you with access to shared records to facilitate patient/carer access to medicines?**

- Not at all  Slightly  Somewhat  
 Very  Extremely

Please give reasons for your response

**SECTION F. NON-MEDICAL PRESCRIBING**

**F1. Are You a Non-Medical Independent Prescriber (nurse or pharmacist prescriber) (V300 qualification)?**

- Yes, actively prescribing as a non-medical prescriber
- Yes, but not actively prescribing
- Not a prescriber
- Not a nurse or a pharmacist (e.g. general practitioner) -please go to question F6

If you are not actively prescribing please state the reasons for this:

If you are not a non-medical prescriber please state the reasons for this: *(Tick all that apply)*

- Cost of training
- Lack of employer/colleague support
- No backfill available
- No designated trainer
- Other

If you selected Other, please specify:

*If you are not a non-medical prescriber, please go to question F6*

**F2. Does your prescribing include controlled drugs?**

- Yes  No

**F3. Are you able to prescribe via an electronic system?**

- Yes, the system enables transfer of the prescription to the pharmacy  
 Yes, but the system does not enable transfer of the prescription to the pharmacy  
 No, prescribing pad only

**F4. On average, how often do you prescribe palliative care medicines?**

- Once a day or more  2-3 times a week  Once a week or less  
 Once a month or less

**F5. Which palliative care medicine classes do you most frequently prescribe?**

|                                            | Often                    | Sometimes                | Rarely                   | Never                    |
|--------------------------------------------|--------------------------|--------------------------|--------------------------|--------------------------|
| Analgesics                                 | <input type="checkbox"/> | <input type="checkbox"/> | <input type="checkbox"/> | <input type="checkbox"/> |
| Anti-emetics                               | <input type="checkbox"/> | <input type="checkbox"/> | <input type="checkbox"/> | <input type="checkbox"/> |
| Laxatives                                  | <input type="checkbox"/> | <input type="checkbox"/> | <input type="checkbox"/> | <input type="checkbox"/> |
| Antifungals                                | <input type="checkbox"/> | <input type="checkbox"/> | <input type="checkbox"/> | <input type="checkbox"/> |
| Corticosteroids                            | <input type="checkbox"/> | <input type="checkbox"/> | <input type="checkbox"/> | <input type="checkbox"/> |
| Hypnotics and muscle relaxants             | <input type="checkbox"/> | <input type="checkbox"/> | <input type="checkbox"/> | <input type="checkbox"/> |
| Anti-muscarinics                           | <input type="checkbox"/> | <input type="checkbox"/> | <input type="checkbox"/> | <input type="checkbox"/> |
| Sedatives                                  | <input type="checkbox"/> | <input type="checkbox"/> | <input type="checkbox"/> | <input type="checkbox"/> |
| “Specials” – unlicensed medicinal products | <input type="checkbox"/> | <input type="checkbox"/> | <input type="checkbox"/> | <input type="checkbox"/> |

**F6. Overall, how frequently does non-medical prescribing (prescribing by a nurse or pharmacist) have a beneficial impact on palliative care medicines access?**

Always
  Often
  Sometimes  
 Rarely
  Never
  Don't know

Please give reasons for your response

**SECTION G. QUESTIONS FOR COMMUNITY PHARMACISTS**

*If you are not a community pharmacist please go to Section H*

**G1. Palliative care medicines access issues**

How frequently do you:

|                                                                                                                      | Always                   | Often                    | Sometimes                | Rarely                   | Never                    |
|----------------------------------------------------------------------------------------------------------------------|--------------------------|--------------------------|--------------------------|--------------------------|--------------------------|
| Undertake medicines optimisation reviews for palliative care patients?                                               | <input type="checkbox"/> | <input type="checkbox"/> | <input type="checkbox"/> | <input type="checkbox"/> | <input type="checkbox"/> |
| Feel that lack of awareness of patients' palliative status influences your ability to help patients access medicines | <input type="checkbox"/> | <input type="checkbox"/> | <input type="checkbox"/> | <input type="checkbox"/> | <input type="checkbox"/> |
| Encounter a discrepancy between palliative care medicines prescribed and the stock you hold                          | <input type="checkbox"/> | <input type="checkbox"/> | <input type="checkbox"/> | <input type="checkbox"/> | <input type="checkbox"/> |

# Page 16

How frequently do you:

|                                                                                                                        | Always                   | Often                    | Sometimes                | Rarely                   | Never                    |
|------------------------------------------------------------------------------------------------------------------------|--------------------------|--------------------------|--------------------------|--------------------------|--------------------------|
| Limit your stock of palliative care medicines because 'use by' dates are likely to expire                              | <input type="checkbox"/> | <input type="checkbox"/> | <input type="checkbox"/> | <input type="checkbox"/> | <input type="checkbox"/> |
| Limit your stock of palliative care medicines because of lack of storage space                                         | <input type="checkbox"/> | <input type="checkbox"/> | <input type="checkbox"/> | <input type="checkbox"/> | <input type="checkbox"/> |
| Experience problems receiving prescriptions electronically from patients' GP practices                                 | <input type="checkbox"/> | <input type="checkbox"/> | <input type="checkbox"/> | <input type="checkbox"/> | <input type="checkbox"/> |
| Encounter carers not having satisfactory identification, seeking to collect controlled drug prescriptions for patients | <input type="checkbox"/> | <input type="checkbox"/> | <input type="checkbox"/> | <input type="checkbox"/> | <input type="checkbox"/> |



**SECTION H. OVERALL SERVICE PROVISION**

**H1. If you are a prescriber, how competent do you feel in prescribing palliative care medicines?**

|                                  |                                 |                                      |
|----------------------------------|---------------------------------|--------------------------------------|
| <input type="radio"/> Not at all | <input type="radio"/> Slightly  | <input type="radio"/> Somewhat       |
| <input type="radio"/> Very       | <input type="radio"/> Extremely | <input type="radio"/> Not applicable |

**H2. Are there possible solutions to any gaps or problems with service delivery?**

|                           |                          |
|---------------------------|--------------------------|
| <input type="radio"/> Yes | <input type="radio"/> No |
|---------------------------|--------------------------|

If yes, please describe

We want to try and understand how effective you think the service you currently offer is. We are going to do this by asking you to think about pain management in particular.

H3. Out of a typical 100 palliative care patients during the last year of life who use your service, estimate the proportion with no pain, mild pain, moderate pain or severe pain at any one point in time.

*Enter your estimates below and ensure the answers sum to 100:*

No Pain

Mild Pain

Moderate Pain

Severe Pain

H4. Imagine there were no barriers to medicines access in your service and all patients could receive the medicines they need quickly. What proportions of pain severity would there be with ideal medicines access?

*Enter your estimates below and ensure the answers sum to 100:*

No Pain

Mild Pain

Moderate Pain

Severe Pain

**SECTION I. And FINALLY**

**I1. If you have any other comments to make about access to medicines at end-of-life please use this space:**

**I2. Please tell us the first part of your work postcode, so we can map the geographical spread of responses. This will be removed from the questionnaire so your data remain anonymous.**

**I3. If you work in a GP practice or community pharmacy please provide your organisation ODS code (sometimes known as a J code). This will be used to map your participation with your Clinical Research Network (CRN), and removed from the questionnaire so your data remain anonymous.**

Not applicable       Don't know

**ODS (or J) code:**

**14. In the next stage of the study we will be conducting case studies of medicines access experiences with patients, carers and healthcare professionals. Would you be willing to be contacted by the research team to discuss taking part in the next phase of our study?**

Yes

No

**15. If yes, please give your name and email address. These will be removed from the questionnaire so your data remains anonymous.**

Name:

Email address:

**Thank you for taking the time to  
complete this survey**

*Please return your completed survey to:*

**FREE POST RTXY-ZBLS-GJXL**

Jakki Birtwistle, Research Fellow, Leeds Institute of Health Sciences,

Room 10.39, Level 10,

The Worsley Medical and Dental Building,

Clarendon Way, LEEDS LS2 9NL

---
